# Supplementary material
Source: publisher site journal article supplement (https://www.dovepress.com/article/400707)
Supplement: Supplementary file 1 [file get_supplementary_file.php]

# Supplementary Appendix 1

# Supplementary methods

## Derivation of baseline modified Medical Research Council dyspnea scale score

The GALAXY-COPD model baseline parameter inputs included the proportion of the population with modified Medical Research Council (mMRC) dyspnea scale score ≥2, which identified the level of dyspnea symptoms in the population at baseline. Based on a publication by Jones et al,1 the proportion of patients with COPD (chronic obstructive pulmonary disease) Assessment Test (CAT) score ≥21 was assumed to be the same as the proportion of patients with mMRC ≥2.

## Derivation of baseline fibrinogen

A previously developed risk equation to predict fibrinogen level based on other concurrent baseline parameter values was used. This risk equation was developed through analysis of data from the Evaluation of COPD Longitudinally to Identify Predictive Surrogate End-points (ECLIPSE) study in patients with complete baseline data that included fibrinogen values (N=1957). The most efficient model in the analysis included the following covariates for prediction of fibrinogen: age, forced expiratory volume in 1 second (FEV1; L), smoking status, ≥1 exacerbations in the preceding 12 months, and body mass index (BMI) (both low and high categories relative to the reference [middle] category). This equation was used to estimate baseline fibrinogen in the Study 207626 cohort.

## Derivation of baseline 6-minute walk test

The 6-minute walk test (6MWT) is a time-varying parameter that is predicted using an existing risk equation (obtained from ECLIPSE study data) based on age, fibrinogen, sex distribution of the cohort, FEV1% predicted, height, cardiovascular comorbidity, mMRC score, and BMI >30 mg/m2. This equation was used to estimate baseline 6MWT in the Study 207626 population.

## Calculation of upper and lower values used for one-way sensitivity analyses

Base case values for baseline fibrinogen and 6MWT were predicted rather than observed. A range for the sensitivity analysis was constructed by approximating a 95% confidence interval (CI) using observed data from the ECLIPSE study. The mean (95% CI) for fibrinogen was 460.5 μg/dL (455.8, 465.1 μg/dL) and for the 6MWT was 373.3 m (367.9, 378.7 m). The standard error (SE) was calculated and applied (+/− 1.96 SEs) to the predicted values for fibrinogen or 6MWT in the model base case. For baseline mMRC, it was not possible to approximate a 95% CI; therefore, a simple +/− 25% relative to the base case value was used. For FEV1 increment and St George’s Respiratory Questionnaire change treatment effects, 95% CI around the mean values were used.

## Probabilistic analysis

Probabilistic analysis was conducted to address uncertainty in parameters used in the model by assigning distributions to input parameters and randomly sampling from these distributions over 5000 Monte Carlo simulations. Parameter distributions assigned in the analysis are presented in Table S2. For the risk equations, these were populated using correlated draws from a Cholesky decomposition table developed from the covariance matrices for each equation. The decomposition tables were applied using a random draw from a standard normal distribution for each coefficient. The random number was used to adjust the coefficient based on its own variability and its correlation with the other coefficients in that equation. The resulting adjusted values were applied as marginal differences between the mean estimate of the coefficient and the value to be applied in the current probabilistic analysis draw.

# Supplementary tables

**Table S1** Costs of medical management of moderate exacerbations (2021 GBP)

| **Treatment** | **Duration of treatment (days)** | **Dose** | **Times per day** | **Unit cost** | **Cost per course** |
| --- | --- | --- | --- | --- | --- |
| OCS: prednisolone | 5 | 30 mg QD | 1 | £1.67 | £8.37 |
| Antibiotics: amoxicillin | 5 | 500 mg TID | 3 | £0.57 | £2.87 |
| Antibiotics: doxycycline | 5 | 200 mg once, then 100 mg QD | 1 | £0.38 | £1.89 |
| Antibiotics: clarithromycin | 5 | 500 mg BID | 2 | £1.38 | £6.90 |
| **Weighted cost per exacerbation** | | | | | £9.14 |

**Notes:** Sourced from National Institute for Health and Care Excellence.2–4
**Abbreviations:** BID, twice daily; GBP, British Pound; OCS, oral corticosteroid; QD, once daily; TID, three times daily.

**Table S2** One-way sensitivity analyses input values

| **Parameter** | **Base case** | **Lower value**  **(lower limit of 95% CI)** | **Upper value**  **(upper limit of 95% CI)** |
| --- | --- | --- | --- |
| **Baseline inputs not available from Study 207626** | | | |
| Fibrinogen, µg/dL | 472.9 | 468.3 | 477.6 |
| 6MWT, m | 364.8 | 359.4 | 370.2 |
| mMRC scorea, % | 47.6 | 35.7 | 59.5 |
| **Treatment effects (difference in change from baseline), FF/UMEC/VI versus TIO** | | | |
| FEV1 increment, mL | 95 | 62 | 128 |
| SGRQ change | −3.2 | −1.4 | −5.0 |

**Notes:** aAs it was not possible to approximate a 95% CI, +/− 25% relative to the base case value was used.

**Abbreviations:** 6MWT, 6-minute walk test; CI, confidence interval; FEV1, forced expiratory volume in 1 second; FF, fluticasone furoate; mMRC, modified Medical Research Council; SGRQ, St George’s Respiratory Questionnaire; TIO, tiotropium; UMEC, umeclidinium; VI, vilanterol.

**Table S3** Parameter distributions assigned in model probabilistic analyses

| **Input parameter** | **Distribution and inputs** |
| --- | --- |
| Baseline parameter inputs | Fixed |
| Risk equations | Cholesky decomposition matrix included for each risk equation. The decomposition tables were applied using a random draw from a standard normal distribution (mean 0, standard deviation of 1) for each coefficient |
| FEV1 increment from baseline | Normal (mean: 95; 95% CI 62, 128) |
| SGRQ change from baseline | Normal (mean: −3.2; 95% CI −1.4, −5.0) |
| Drug costs and resource use costs | Fixed |

**Notes:** Exacerbation treatment effect was not included in the model. Hence, relative risks for moderate and severe exacerbation reductions were not included in the probabilistic analyses. It should be noted that intercept and coefficients of moderate and severe exacerbation risk equations were varied using the Cholesky covariance matrix in the probabilistic analyses.

**Abbreviations:** CI, confidence interval; FEV1, forced expiratory volume in 1 second; SGRQ, St George’s Respiratory Questionnaire.

**Table S4** Results of sensitivity analyses, FF/UMEC/VI versus TIO, 2021 GBP

| **Analysis** | **Incremental LYs** | **Incremental QALYs** | **Incremental costs, 2021 GBP** | **ICER/QALY** |
| --- | --- | --- | --- | --- |
| **Base case** | 0.393 | 0.443 | −£880 | Dominant |
| **Baseline demographics** | | | | |
| Fibrinogen lower CI using ECLIPSE data | 0.394 | 0.445 | −£878 | Dominant |
| Fibrinogen upper CI using ECLIPSE data | 0.391 | 0.441 | −£859 | Dominant |
| 6MWT lower CI using ECLIPSE data | 0.392 | 0.443 | −£856 | Dominant |
| 6MWT upper CI using ECLIPSE data | 0.393 | 0.443 | −£880 | Dominant |
| mMRC −25% | 0.398 | 0.447 | −£878 | Dominant |
| mMRC +25% | 0.387 | 0.438 | −£860 | Dominant |
| **Treatment effects (FF/UMEC/VI versus TIO)** | | | | |
| FEV1 lower CI | 0.256 | 0.386 | −£310 | Dominant |
| FEV1 upper CI | 0.530 | 0.500 | −£1378 | Dominant |
| SGRQ lower CI | 0.393 | 0.282 | −£880 | Dominant |
| SGRQ upper CI | 0.393 | 0.598 | −£880 | Dominant |

**Abbreviations:** 6MWT, 6-minute walk test; CI, confidence interval; ECLIPSE, Evaluation of COPD Longitudinally to Identify Predictive Surrogate End-points; FEV1, forced expiratory volume in 1 second; FF, fluticasone furoate; GBP, British Pound; ICER, incremental cost-effectiveness ratio; LYs, life years; mMRC, modified Medical Research Council; QALYs, quality-adjusted life years; SGRQ, St George’s Respiratory Questionnaire; TIO, tiotropium; UMEC, umeclidinium; VI, vilanterol.

# Supplementary references

1. Jones PW, Adamek L, Nadeau G, Banik N. Comparisons of health status scores with MRC grades in COPD: implications for the GOLD 2011 classification. *Eur Respir J*. 2013;42(3):647–654.
2. National Institute for Health and Care Excellence [Internet]. Chronic obstructive disease in over 16s: diagnosis and management. NICE guideline NG115; 2018. Available from: <https://www.nice.org.uk/guidance/NG115>. Accessed April 4, 2022.
3. National Institute for Health and Care Excellence [Internet]. Chronic obstructive pulmonary disease (acute exacerbation): antimicrobial prescribing. NICE guideline NG114; 2018. Available from: <https://www.nice.org.uk/guidance/ng114>. Accessed April 4, 2022.
4. National Institute for Health and Care Excellence [Internet]. British National Formulary (BNF); 2022. Available from: <https://bnf.nice.org.uk/>. Accessed April 4, 2022.
